# Supplementary material for: Clinical and laboratory features of anti-MAG neuropathy without monoclonal gammopathy
Source: PubMed Central journal article supplement (PMC6468000; doi:10.1038/s41598-019-42545-8), 2019-04-16
Supplement: 41598_2019_42545_MOESM1_ESM.pdf [file 41598_2019_42545_MOESM1_ESM.pdf]

SUPPLEMENTARY FILE

Title: **Clinical and laboratory features of anti-MAG neuropathy without monoclonal gammopathy**

Elba Pascual-Goñi MD<sup>1</sup>, Lorena Martín-Aguilar MD<sup>1</sup>, Cinta Lleixa<sup>1</sup>, Laura Martínez-Martínez PhD<sup>4</sup>, Manuel J. Simón-Talero<sup>3</sup>, Jordi Diaz-Manera MD PhD<sup>1,2</sup>, Elena Cortés-Vicente MD PhD<sup>1,2</sup>, Ricard Rojas-Garcia MD PhD<sup>1,2</sup>, Esther Moga MD PhD<sup>4</sup>, Cándido Juárez MD PhD<sup>4</sup>, Isabel Illa MD, PhD<sup>1,2</sup>, Luis Querol MD, PhD<sup>1,2</sup> \*

## Additional file 1: Nerve conduction studies

### a) Patient 1

#### Motor conduction studies

| Nerve               | Distal Motor Latency, ms |               | Amplitude, mV |               | Conduction Velocity, m/s |               |
|---------------------|--------------------------|---------------|---------------|---------------|--------------------------|---------------|
|                     | Values                   | Normal values | Values        | Normal values | Values                   | Normal values |
| Median (wrist), L   | 6.6                      | <3.9          | 10.7          | >6            | 47                       | >50           |
| Ulnar (wrist), L    | 5.8                      | <3.3          | 6.5           | >5            | 52                       | >48           |
| Peroneal (ankle), L | 20.3                     | <5            | 0.4           | >2            | MD                       | >42           |

#### Sensory conduction studies

| Nerve                | Amplitude, $\mu$ V |               | Conduction velocity, m/s |               |
|----------------------|--------------------|---------------|--------------------------|---------------|
|                      | Values             | Normal values | Values                   | Normal values |
| Median (palm), L     | 33                 | >25           | 50                       | >47           |
| Ulnar (wrist), L     | 23                 | >18           | 40                       | >45           |
| Sural (lower leg), L | 10                 | >9            | 33                       | >40           |

#### F-waves studies

| Nerve     | F Latency, ms |               |
|-----------|---------------|---------------|
|           | Values        | Normal values |
| Median, L | 36.1          | < 30          |
| Ulnar, L  | 38.7          | < 31          |

## b) Patient 2

### Motor conduction studies

| Nerve                 | Distal Motor Latency, ms |               | Amplitude, mV |               | Conduction Velocity, m/s |               |
|-----------------------|--------------------------|---------------|---------------|---------------|--------------------------|---------------|
|                       | Values                   | Normal values | Values        | Normal values | Values                   | Normal values |
| Median (wrist), R     | 5.9                      | <3.9          | 5.1           | >6            | 44                       | >50           |
| Tibial (ankle), R/L   | 10.8/9.5                 | <6            | 0.2/0.3       | >3            | 19/22                    | >38           |
| Peroneal (ankle), R/L | 9.1/7.9                  | <5            | 1.1/1.4       | >2            | 23/28                    | >42           |

### Sensory conduction studies

| Nerve                | Amplitude, $\mu$ V |               | Conduction velocity, m/s |               |
|----------------------|--------------------|---------------|--------------------------|---------------|
|                      | Values             | Normal values | Values                   | Normal values |
| Radial (forearm), R  | 6                  | >11           | 50                       | >47           |
| Sural (lower leg), L | 3                  | >5            | 39                       | >38           |

### F-waves studies

| Nerve     | F Latency, ms |               |
|-----------|---------------|---------------|
|           | Values        | Normal values |
| Median, R | 46.4          | < 30          |
| Ulnar, R  | 45.8          | < 31          |

### c) Patient 3

#### Motor conduction studies

| Nerve               | Distal Motor Latency, ms |               | Amplitude, mV |               | Conduction Velocity, m/s |               |
|---------------------|--------------------------|---------------|---------------|---------------|--------------------------|---------------|
|                     | Values                   | Normal values | Values        | Normal values | Values                   | Normal values |
| Median (wrist), R   | 4.6                      | <3.9          | 5.7           | >6            | 51                       | >50           |
| Ulnar (wrist), R    | 3.4                      | <3.3          | 8.5           | >5            | 59                       | >48           |
| Peroneal (ankle), R | 4.7                      | <5            | 2.2           | >2            | 44                       | >42           |
| Tibial (ankle), R   | 3.7                      | <6            | 8.4           | >3            | 42                       | >38           |

#### Sensory conduction studies

| Nerve                   | Amplitude, $\mu$ V |               | Conduction velocity, m/s |               |
|-------------------------|--------------------|---------------|--------------------------|---------------|
|                         | Values             | Normal values | Values                   | Normal values |
| Ulnar (wrist), R        | 11.7               | >15           | 39                       | >42           |
| S Peroneal (lat leg), R | 2.7                | >6            | 38                       | >39           |

#### F-waves studies

| Nerve         | F Latency, ms |               |
|---------------|---------------|---------------|
|               | Values        | Normal values |
| Ulnar, R      | 32.6          | < 27          |
| D peroneal, R | 58.4          | < 47          |
| Tibial, R     | 59.9          | <48           |

#### d) Patient 4

##### Motor conduction studies

| Nerve                 | Distal Motor Latency, ms |               | Amplitude, mV |               | Conduction Velocity, m/s |               |
|-----------------------|--------------------------|---------------|---------------|---------------|--------------------------|---------------|
|                       | Values                   | Normal values | Values        | Normal values | Values                   | Normal values |
| Median (wrist), R     | 10                       | <3.9          | 5.4           | >6            | 19                       | >50           |
| Ulnar (wrist), R      | 9.2                      | <3.3          | 2.6           | >5            | 18                       | >48           |
| Peroneal (ankle), R/L | NA/NA                    | <5            | NR/NR         | >2            | NA/NA                    | >42           |

##### Sensory conduction studies

| Nerve                | Amplitude, $\mu$ V |               | Conduction velocity, m/s |               |
|----------------------|--------------------|---------------|--------------------------|---------------|
|                      | Values             | Normal values | Values                   | Normal values |
| Median (wrist), R    | NR                 | >16           | NA                       | >44           |
| Ulnar (wrist), R     | NR                 | >15           | NA                       | >42           |
| Radial (forearm), R  | NR                 | >11           | NA                       | >47           |
| Sural (lower leg), L | NR                 | >5            | NA                       | >38           |

##### F-waves studies

| Nerve    | F Latency, ms |               |
|----------|---------------|---------------|
|          | Values        | Normal values |
| Ulnar, R | NR            | < 31          |

MD, missing data; NA not applicable; NR, No response.
